# Supplementary material for: Microfluidic on-chip valve and pump for applications in immunoassays
Source: Royal Society of Chemistry journal article supplement (doi:10.1039/d2lc01042a), 2022-12-21
Supplement: d2lc01042a2.pdf [file d2lc01042a2.pdf]

## **Supporting Information for**

# **Microfluidic On-chip Valve and Pump for Applications in Immunoassays**

Haiying Shen,<sup>a,b,c</sup> Qiliang Li,<sup>d</sup> Wenqi Song<sup>\*d</sup> and Xingyu Jiang<sup>\*b,c</sup>

<sup>a</sup> National Institute of Metrology China, Beijing 100029, People's Republic of China

<sup>b</sup> Guangdong Provincial Key Laboratory of Advanced Biomaterials, Shenzhen Key Laboratory of Smart Healthcare Engineering, Department of Biomedical Engineering, Southern University of Science and Technology, Guangdong 518055, People's Republic of China

<sup>c</sup> National Center for NanoScience and Technology, Chinese Academy of Sciences, Beijing 100190, People's Republic of China

<sup>d</sup> Department of Clinical Laboratory Center, Beijing Children's Hospital, Capital Medical University, National Center for Children Health, Beijing 100045, People's Republic of China

\*Corresponding authors: jiang@sustech.edu.cn (Xingyu Jiang), songwenqi1218@163.com (Wenqi Song)

## Table of Contents

### Supplementary Figures

|                 |   |
|-----------------|---|
| Figure S1 ..... | 3 |
| Figure S2 ..... | 4 |
| Figure S3 ..... | 5 |
| Figure S4 ..... | 6 |
| Figure S5 ..... | 7 |

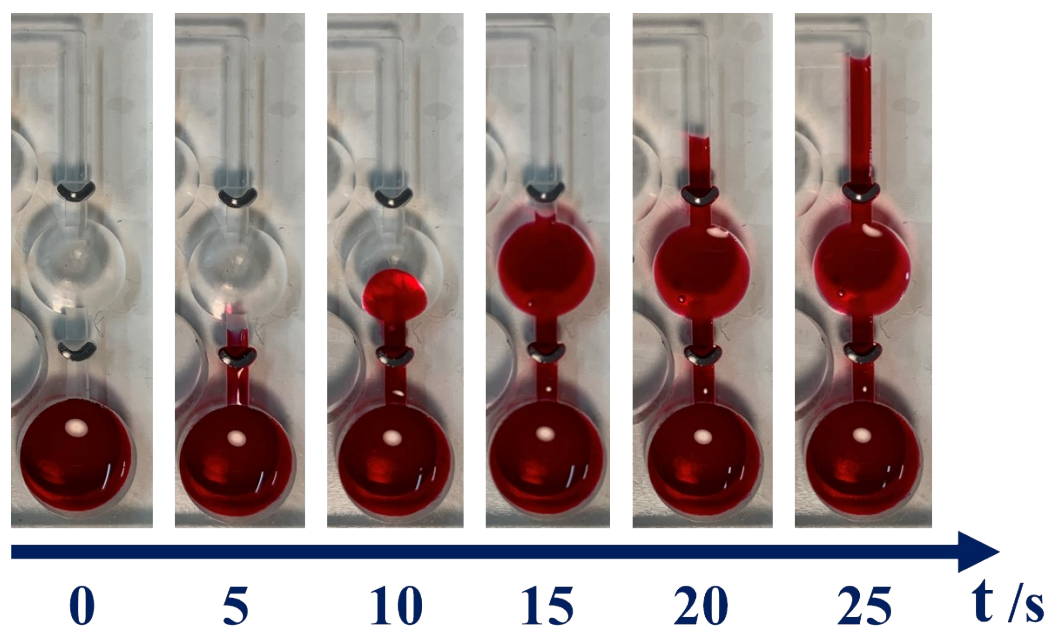

Figure S1 The photos of the unidirectional flow

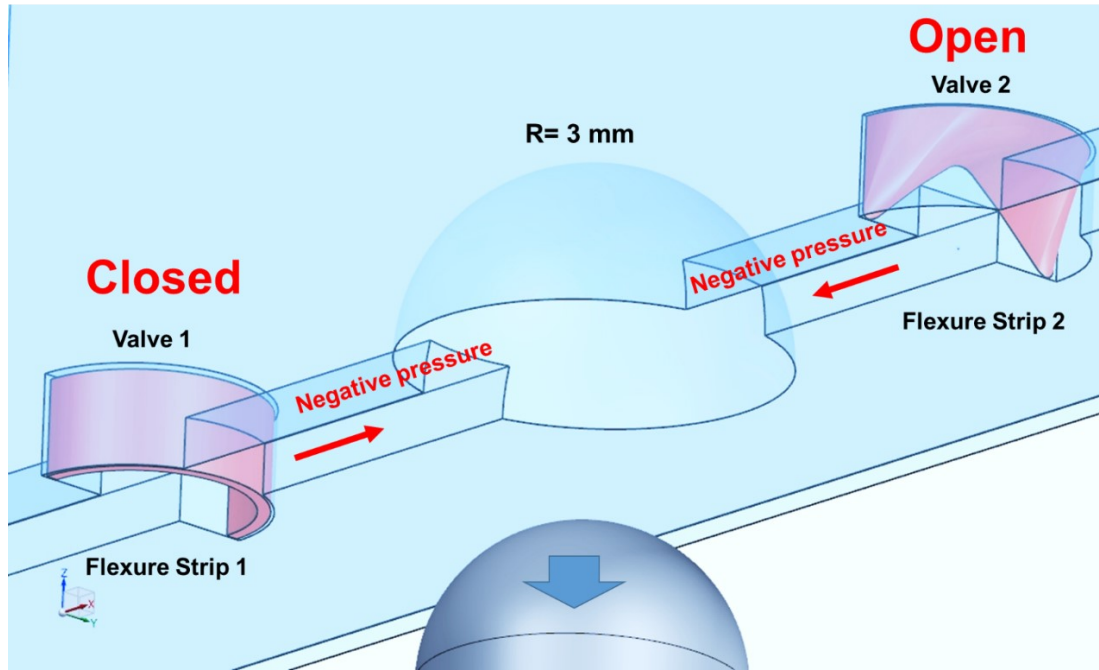

Figure S2 The view from the bottom when the pole moves down

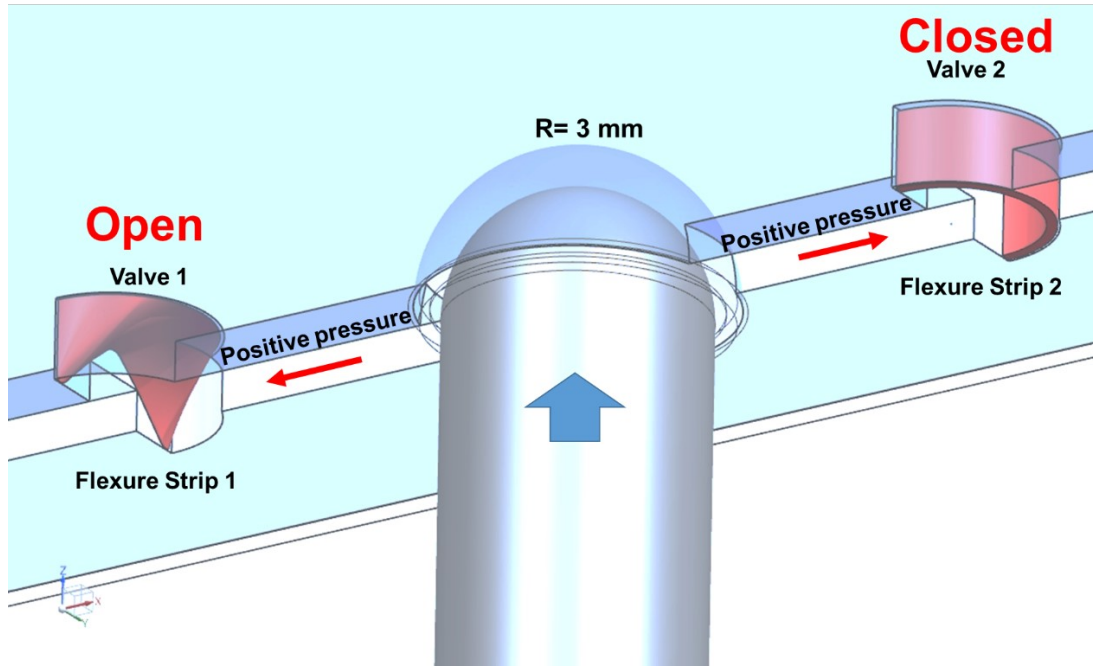

Figure S3 The view from the bottom when the pole moves up

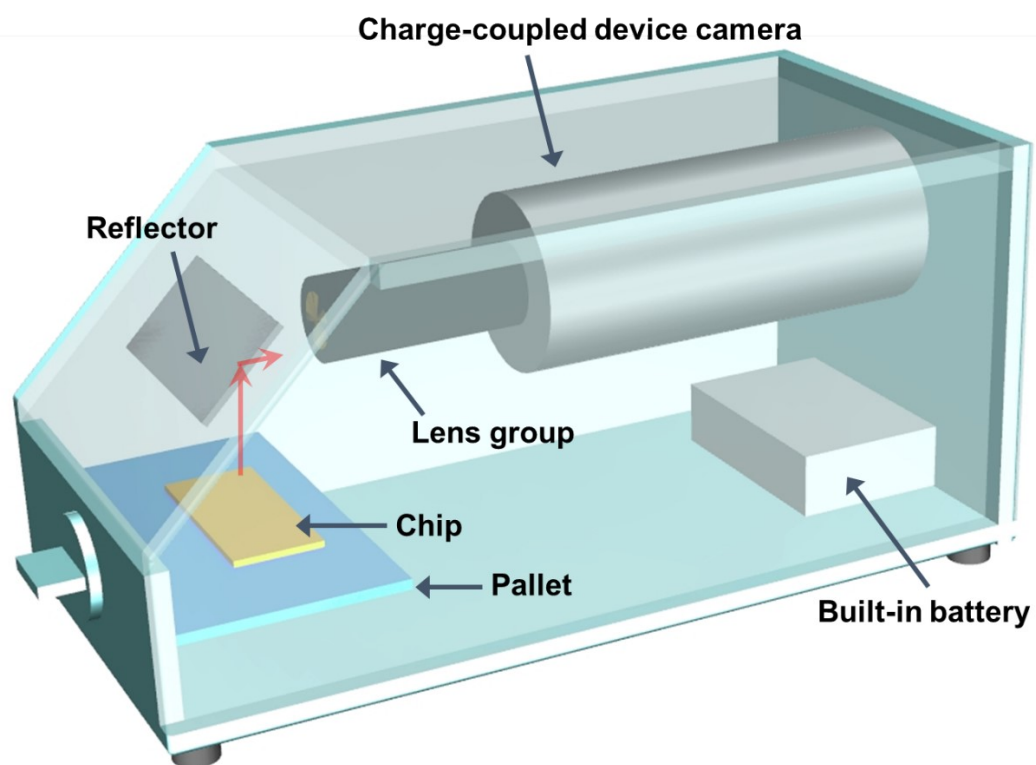

Figure S4 The schematic of the portable instrument for chemiluminescence imaging

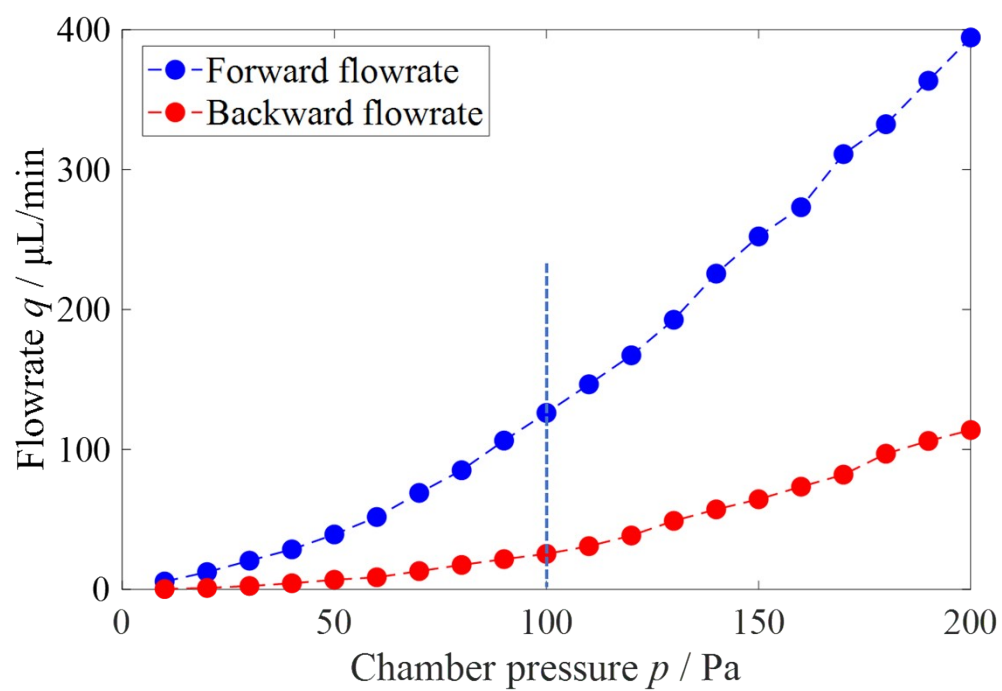

Figure S5 The curve of pressure versus forward flowrate and backward flowrate
